# Supplementary material
Source: PubMed Central journal article supplement (PMC5710201)
Supplement: jamaophthalmol-135-724-s001.pdf [file jamaophthalmol-135-724-s001.pdf]

## Supplementary Online Content

Richter GM, Wang M, Jiang X, et al; Chinese American Eye Study Group. Ocular determinants of refractive error and its age- and sex-related variations in the Chinese American Eye Study. *JAMA Ophthalmol*. Published online May 18, 2017. doi:10.1001/jamaophthalmol.2017.1176

**eFigure 1.** Association Among Age, Sex, and Spherical Equivalent (SE) Plotted Using LOWESS

**eFigure 2.** Association Among Age, Sex, and Mean Axial Length (AL) Plotted Using LOWESS

**eFigure 3.** Association Among Age, Sex, and Mean Vitreous Chamber Depth Plotted Using LOWESS

**eFigure 4.** Association Among Age, Sex, and Mean Anterior Chamber Depth (ACD) Plotted Using LOWESS

**eFigure 5.** Association Among Age, Sex, and Mean Lens Thickness Plotted Using LOWESS

**eTable 1.** Age-Stratified Multivariate Linear Regression Models Demonstrating Association of Ocular Variables with Age

**eTable 2.** Age-Stratified Multiple Linear Regression Models Demonstrating Ocular Determinants of Refractive Error in CHES

This supplementary material has been provided by the authors to give readers additional information about their work.

**eFigure 1. Association Among Age, Sex, and Spherical Equivalent (SE) Plotted Using LOWESS**

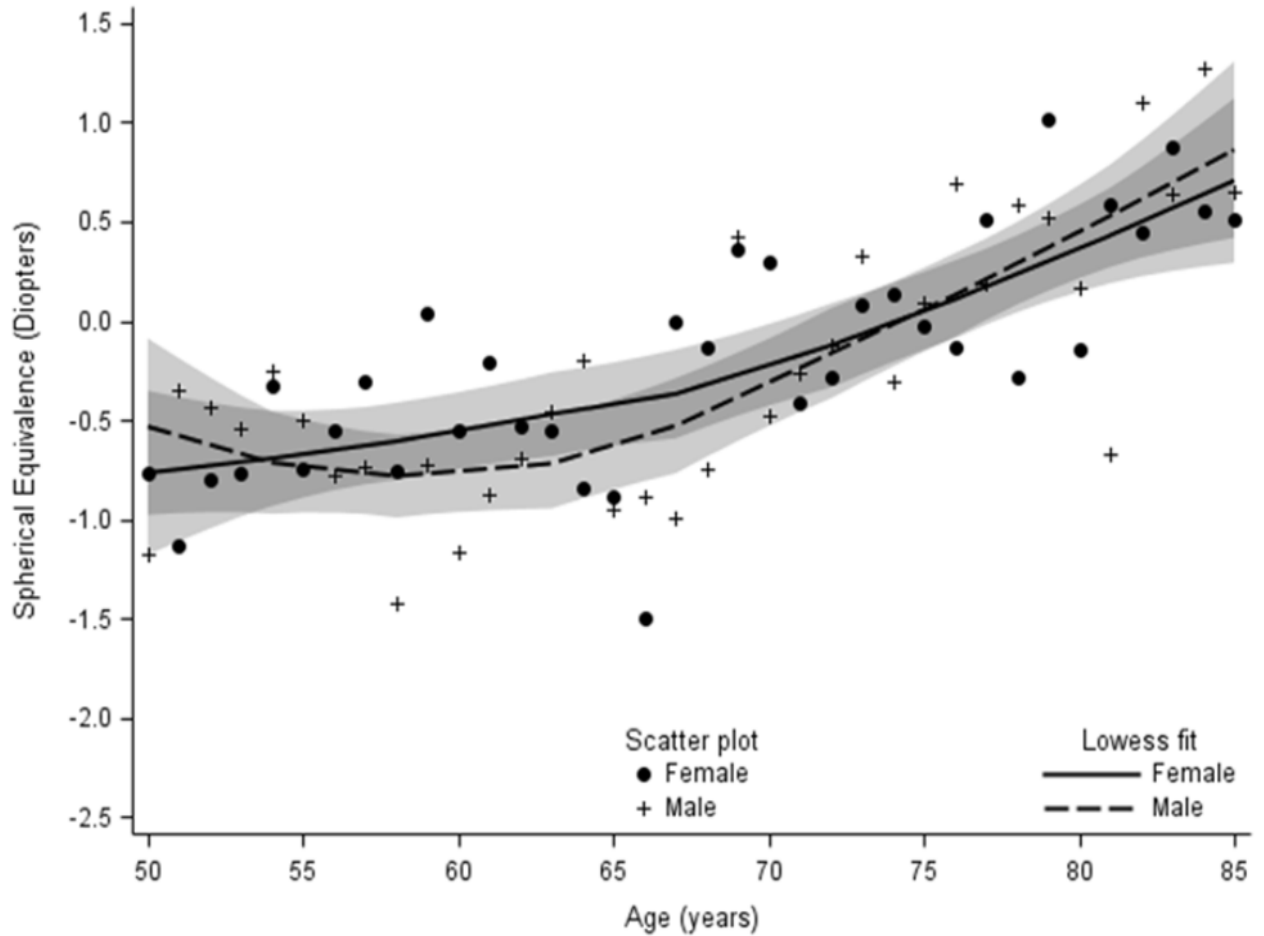

**The mean data are plotted for each year from ages 50 to 85+, with a 95% confidence interval. The locally weighted regression lines that best fit the data are also shown. Beyond 60 to 65 years, there is a greater SE refractive error each year.**

**eFigure 2. Association Among Age, Sex, and Mean Axial Length (AL) Plotted Using LOWESS**

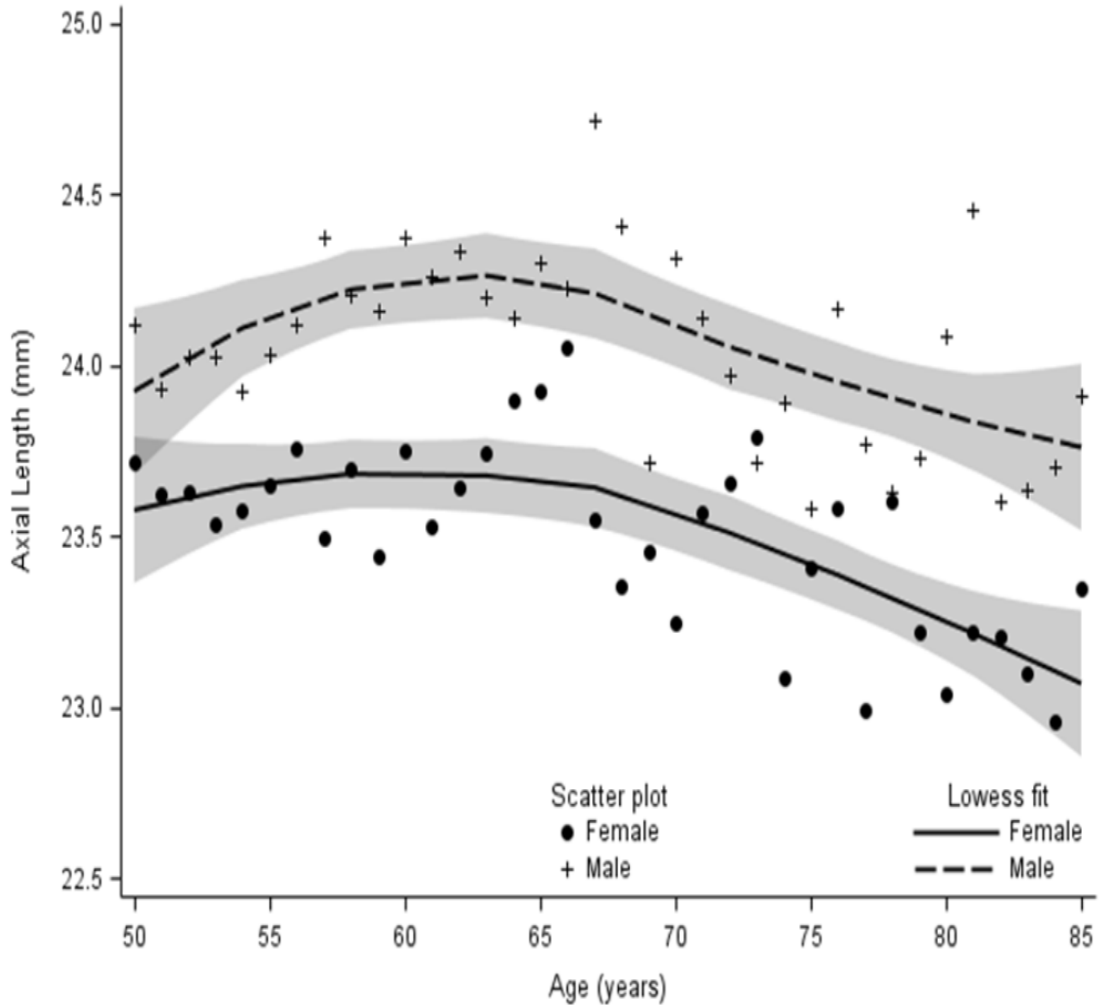

**The mean data are plotted for each year from ages 50 to 85+, with a 95% confidence interval. The locally weighted regression lines that best fit the data are also shown. The overall difference between axial length in men and women is demonstrated in the relatively parallel and separate regression lines across the age distribution.**

**eFigure 3. Association Among Age, Sex, and Mean Vitreous Chamber Depth Plotted Using LOWESS**

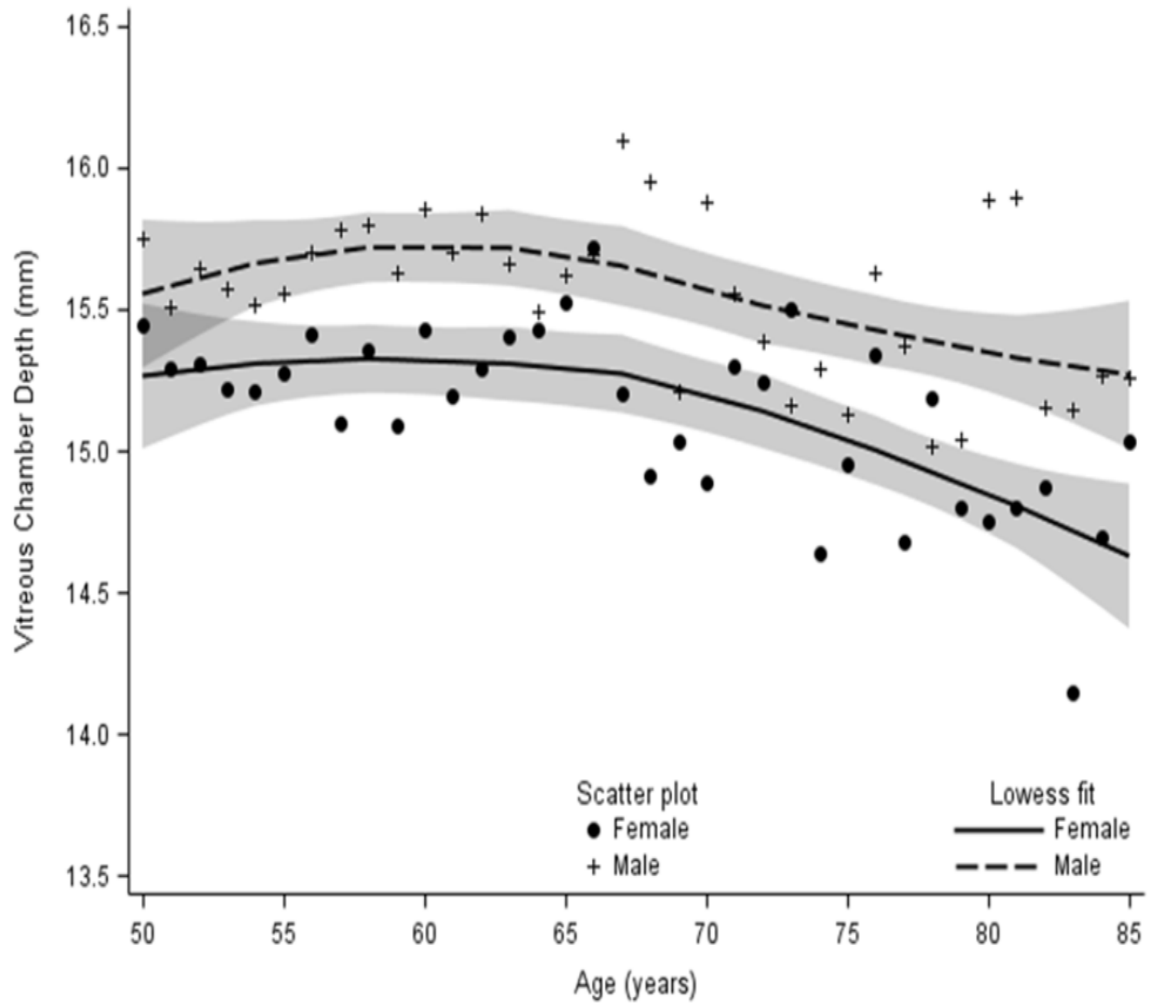

**The mean data are plotted for each year from ages 50 to 85+, with a 95% confidence interval. The locally weighted regression lines that best fit the data are also shown. There appears to be a significant difference in vitreous chamber depth in men versus women.**

**eFigure 4. Association Among Age, Sex, and Mean Anterior Chamber Depth (ACD) Plotted Using LOWESS**

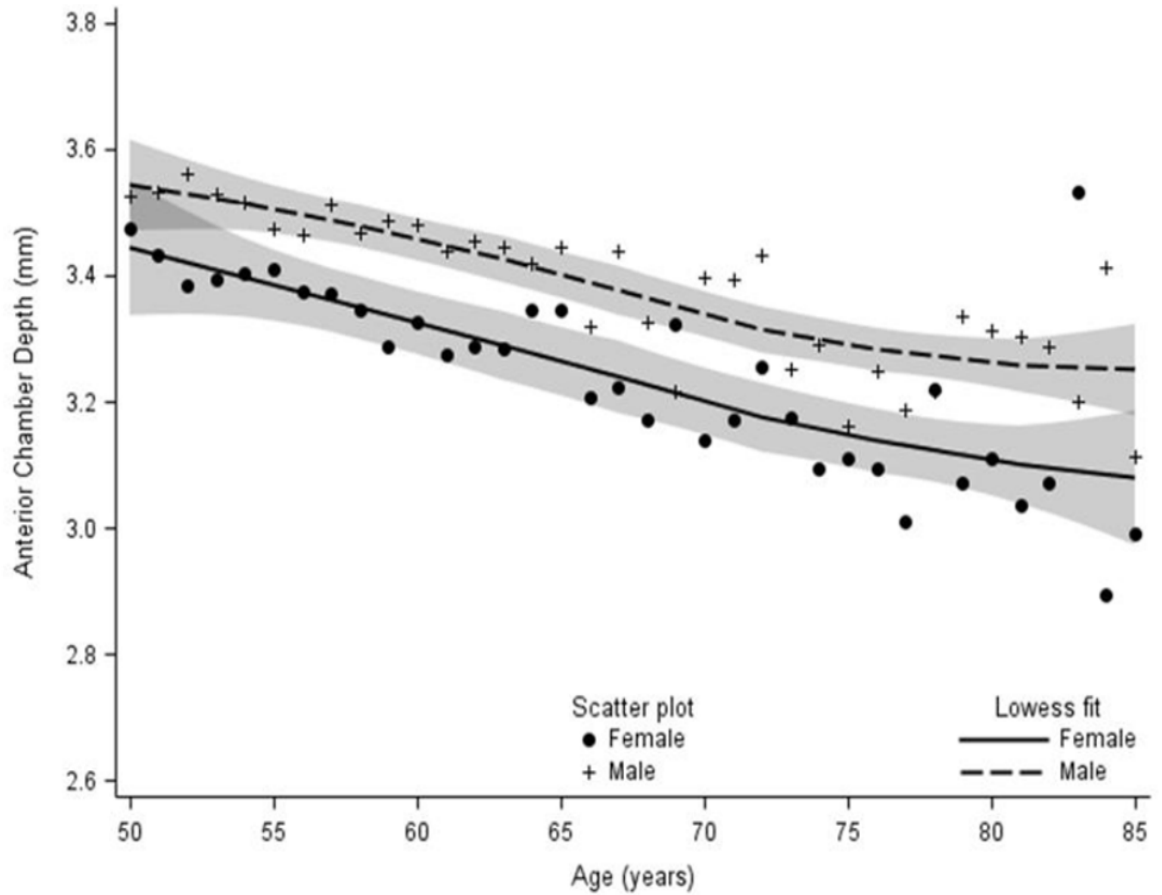

**The data are plotted by means for each year from ages 50 to 85+, with a 95% confidence interval. The locally weighted regression lines that best fit the data are also shown. Mean ACD across age for women and men have relatively parallel and separated regression lines across the age distribution.**

**eFigure 5. Association Among Age, Sex, and Mean Lens Thickness Plotted Using LOWESS**

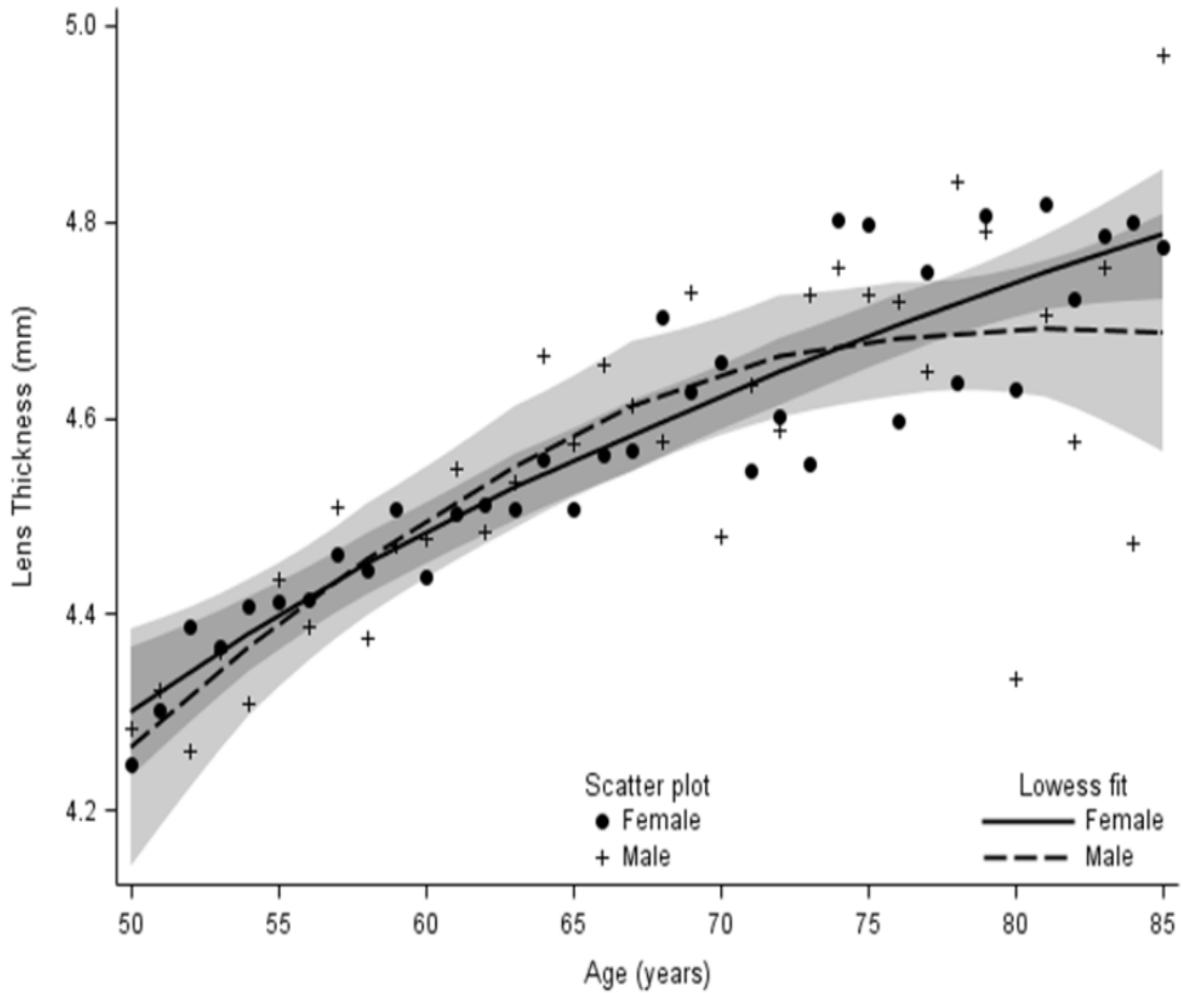

**The data are plotted by means for each year from ages 50 to 85+, with a 95% confidence interval. The locally weighted regression lines that best fit the data are also shown. Lens thickness increases with age for both women and men, but there is virtually no sex difference.**

**eTable 1. Age-Stratified Multivariate Linear Regression Models Demonstrating Association of Ocular Variables with Age**

| <b>Biometric and Clinical Variables</b>  | <b>Regression Coefficient</b> | <b>P Value</b>     |
|------------------------------------------|-------------------------------|--------------------|
| <b>50-59 Age Group</b>                   |                               |                    |
| Spherical Equivalent (D)                 | 0.038                         | .063               |
| Axial Length (mm)                        | 0.004                         | .64                |
| Vitreous Chamber Depth (mm)              | -0.003                        | .77                |
| Anterior Chamber Depth (mm)              | -0.01                         | <.001              |
| Central Corneal Thickness (μm)           | -0.1                          | .695               |
| Lens Thickness (mm)                      | 0.017                         | <.001              |
| Corneal Power (D)                        | 0.01                          | .33                |
| Lens Nuclear Opalescence (LOCS II grade) | 1.14*                         | <.001 <sup>a</sup> |
| <b>60-69 Age Group</b>                   |                               |                    |
| Spherical Equivalent (D)                 | 0.005                         | .88                |
| Axial Length (mm)                        | 0.007                         | .6                 |
| Vitreous Chamber Depth (mm)              | 0.004                         | .77                |
| Anterior Chamber Depth (mm)              | -0.01                         | .004               |
| Central Corneal Thickness (μm)           | -0.08                         | .81                |
| Lens Thickness (mm)                      | 0.014                         | <.001              |
| Corneal Power (D)                        | 0.019                         | .2                 |
| Lens Nuclear Opalescence (LOCS II grade) | 1.11*                         | <.001 <sup>a</sup> |
| <b>70-79 Age Group</b>                   |                               |                    |
| Spherical Equivalent (D)                 | 0.037                         | .35                |
| Axial Length (mm)                        | -0.032                        | .09                |
| Vitreous Chamber Depth (mm)              | -0.034                        | .066               |
| Anterior Chamber Depth (mm)              | -0.016                        | .006               |
| Central Corneal Thickness (μm)           | -0.29                         | .62                |
| Lens Thickness (mm)                      | 0.018                         | .009               |
| Corneal Power (D)                        | 0.008                         | .73                |
| Lens Nuclear Opalescence (LOCS II grade) | 1.10*                         | .011 <sup>a</sup>  |
| <b>80+ Age Group</b>                     |                               |                    |
| Spherical equivalent (D)                 | -0.01                         | .83                |
| Axial Length (mm)                        | 0.009                         | .74                |
| Vitreous Chamber Depth (mm)              | 0.001                         | .97                |
| Anterior Chamber Depth (mm)              | -0.024                        | .015               |
| Central Corneal Thickness (μm)           | 0.36                          | .67                |
| Lens Thickness (mm)                      | 0.032                         | .021               |

|                                          |       |                   |
|------------------------------------------|-------|-------------------|
| Corneal Power (D)                        | 0.009 | .83               |
| Lens Nuclear Opalescence (LOCS II grade) | 1.12* | .093 <sup>a</sup> |

All data were sex-adjusted

CHES = Chinese American Eye Study; LOCS II = Lens Opacification Classification System II

\*Odds ratio for LOCII grade  $\geq 2$  and <sup>a</sup>P value associated with each year of older age



**eTable 2. Age-Stratified Multiple Linear Regression Models Demonstrating Ocular Determinants of Refractive Error in CHES**

| Model 1 <sup>a</sup>          |                             |             |                           |                | Model 2 <sup>a</sup>      |                          |             |                           |                |
|-------------------------------|-----------------------------|-------------|---------------------------|----------------|---------------------------|--------------------------|-------------|---------------------------|----------------|
| Variable                      | Regression<br>n (95%<br>CI) | S<br>R<br>C | SP<br>C<br>C <sup>2</sup> | P<br>Val<br>ue | Variable                  | Regression               | S<br>R<br>C | SP<br>C<br>C <sup>2</sup> | P<br>Val<br>ue |
| <b><u>50-59 Age Group</u></b> |                             |             |                           |                |                           |                          |             |                           |                |
|                               |                             |             |                           |                | Vitreous Chamber Depth    | -2.32 (-2.39, -2.26)     | -1.02       | 0.53                      | <.001          |
| Axial Length                  | -2.02 (-2.08, -1.96)        | -0.93       | 0.54                      | <.001          | Corneal Power             | -0.94 (-0.99, -0.9)      | -0.57       | 0.17                      | <.001          |
| Corneal Power                 | -0.86 (-0.91, -0.81)        | -0.46       | 0.17                      | <.001          | Lens Thickness            | -2.34 (-2.55, -2.13)     | -0.27       | 0.06                      | <.001          |
| Nuclear Opalescence           | 0.06 (-0.10, 0.21)          | 0.09        | 0.001                     | 0.48           | Anterior Chamber Depth    | -0.40 (-0.62, -0.18)     | -0.046      | 0.002                     | <.001          |
|                               |                             |             |                           |                | Central Corneal Thickness | -0.003 (-0.005, -0.002)  | -0.041      | 0.002                     | <.001          |
|                               |                             |             |                           |                | Nuclear Opalescence       | 0.14 (-0.01, 0.28)       | 0.021       | 0.004                     | .06            |
| Model R <sup>2</sup>          | 0.71                        |             |                           |                | Model R <sup>2</sup>      | 0.75                     |             |                           |                |
| <b><u>60-69 Age Group</u></b> |                             |             |                           |                |                           |                          |             |                           |                |
|                               |                             |             |                           |                | Vitreous Chamber Depth    | -2.31 (-2.38, -2.23)     | -0.98       | 0.57                      | <.001          |
| Axial Length                  | -2.06 (-2.13, -1.99)        | -0.93       | 0.63                      | <.001          | Corneal Power             | -0.88 (-0.94, -0.82)     | -0.43       | 0.14                      | <.001          |
| Corneal Power                 | -0.81 (-0.87, -0.75)        | -0.39       | 0.13                      | <.001          | Lens Thickness            | -2.14 (-2.39, -1.90)     | -0.25       | 0.049                     | <.001          |
| Nuclear Opalescence           | -0.24 (-0.39, -0.10)        | -0.046      | 0.002                     | 0.001          | Anterior Chamber Depth    | -0.49 (-0.76, -0.22)     | -0.05       | 0.002                     | <.001          |
|                               |                             |             |                           |                | Central Corneal Thickness | -0.003 (-0.005, -0.0004) | -0.03       | 0.001                     | .025           |
|                               |                             |             |                           |                | Nuclear                   | -0.14 (-                 | -           | 0.0                       | .05            |

|             |      |  |  |  |             |             |           |         |   |
|-------------|------|--|--|--|-------------|-------------|-----------|---------|---|
|             |      |  |  |  | Opalescence | 0.28, 0.00) | 0.0<br>26 | 00<br>7 | 2 |
|             |      |  |  |  |             |             |           |         |   |
| Model $R^2$ | 0.73 |  |  |  | Model $R^2$ | 0.76        |           |         |   |
